# Supplementary material
Source: Springer Nature journal article supplement (https://www.springermedizin.de/resource/supplementary/12947_2009_279_MOESM6_ESM.pdf/9556602)

**CA Response to Mental Stress  
and NTG (%)**

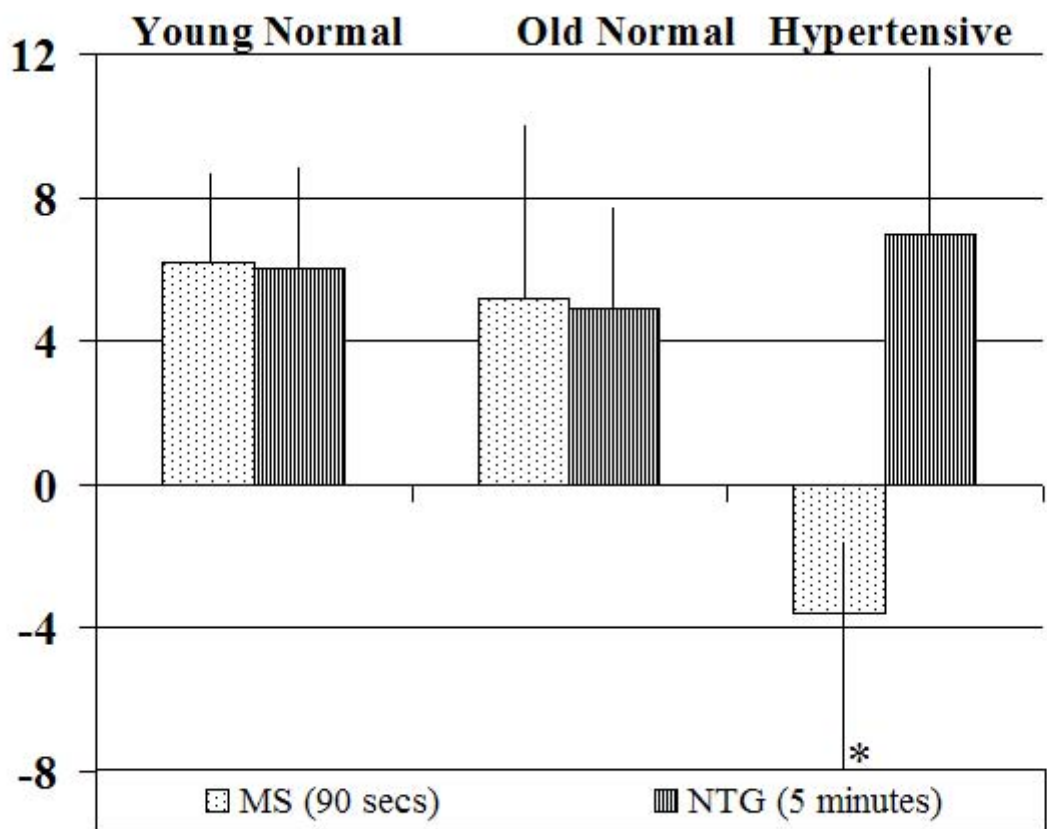

\* $p < 0.02$  vs all N

Supplement: MOESM6 [file 9556602]
